# Supplementary material
Source: publisher figshare collection journal article supplement (https://tandf.figshare.com/articles/dataset/_/6809186)

Supplemental Figure 1

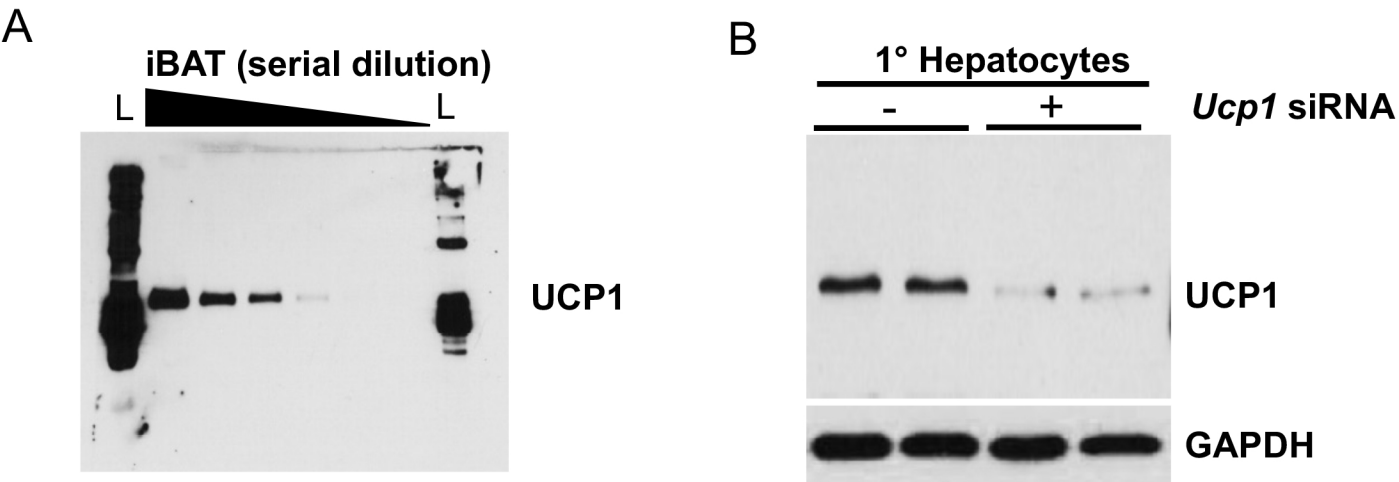

Supplemental Figure 2

A

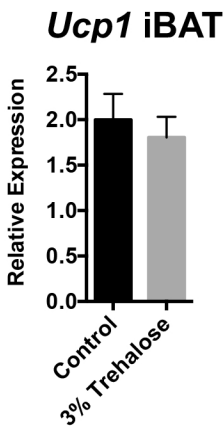

B

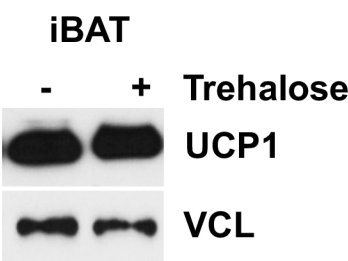

# Supplemental Figure 3

A

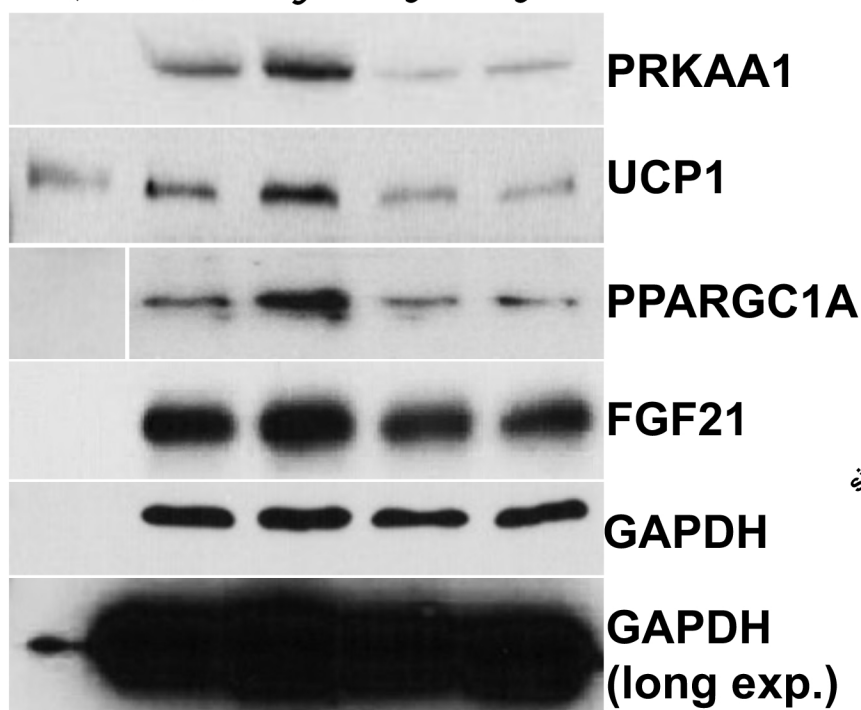

C

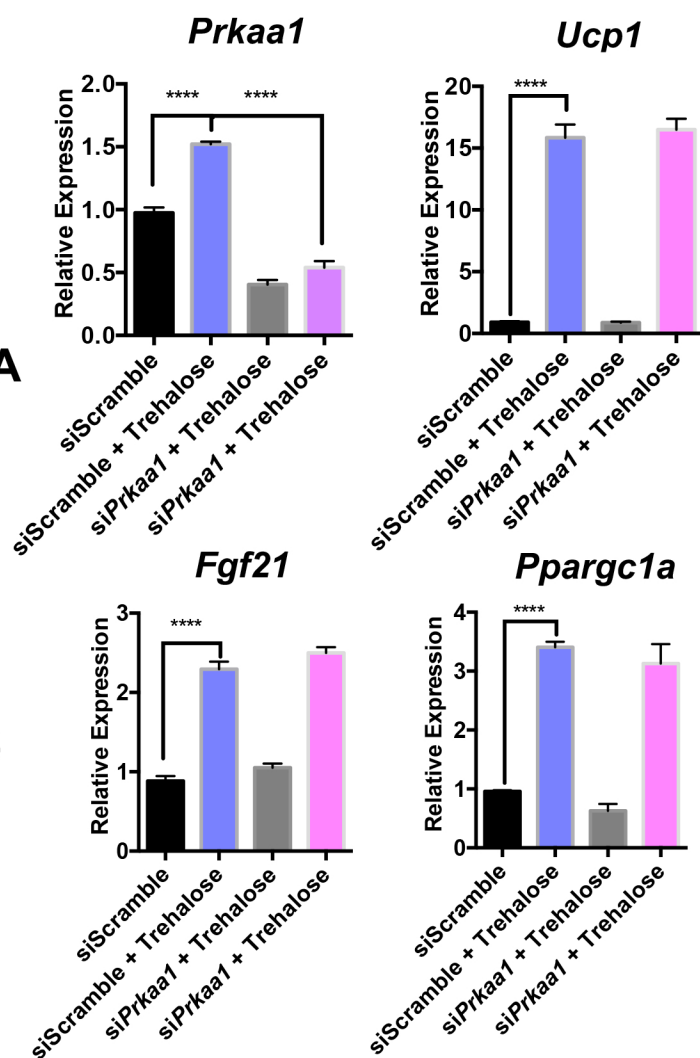

B

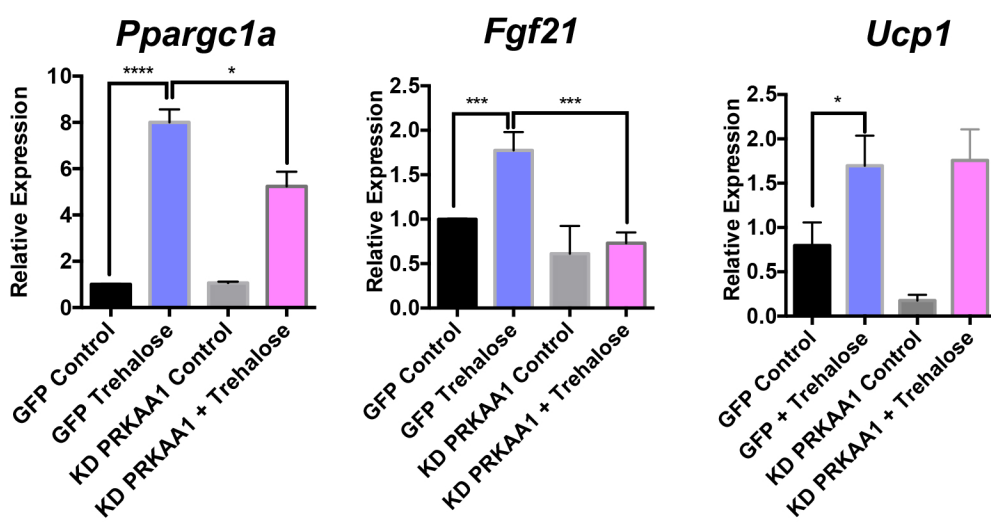

Supplemental Figure 4

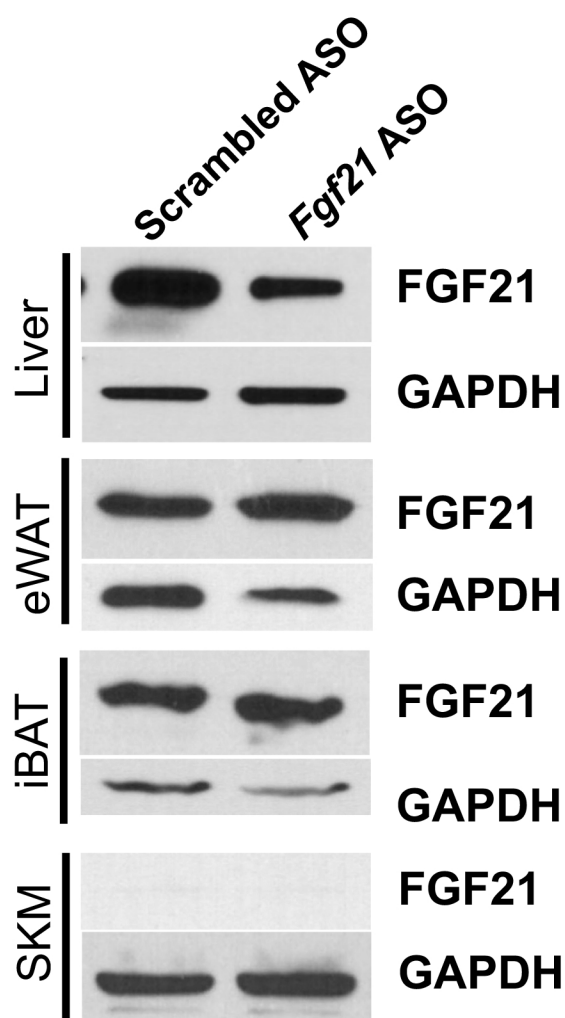

in mice from



Supplemental Figure 5

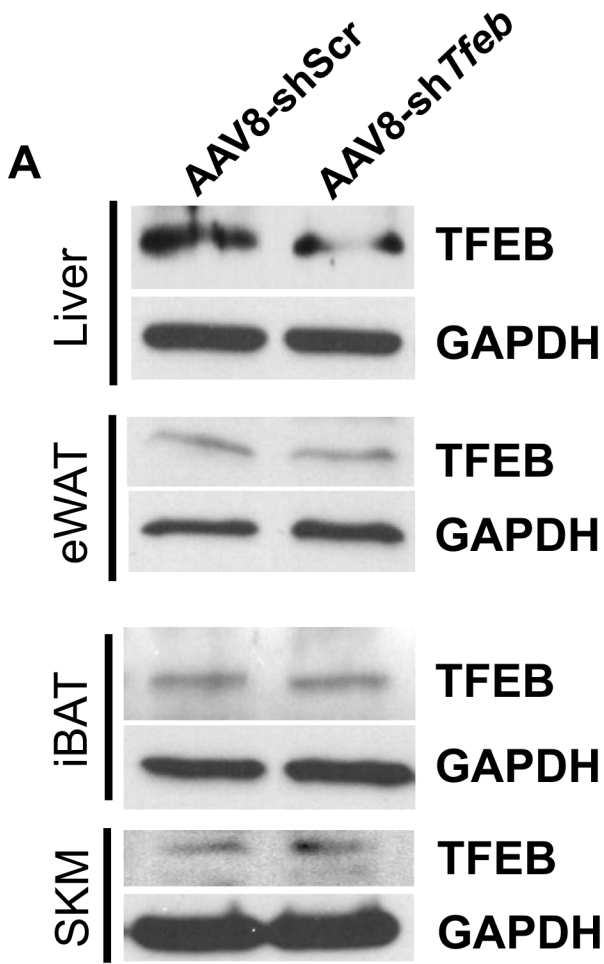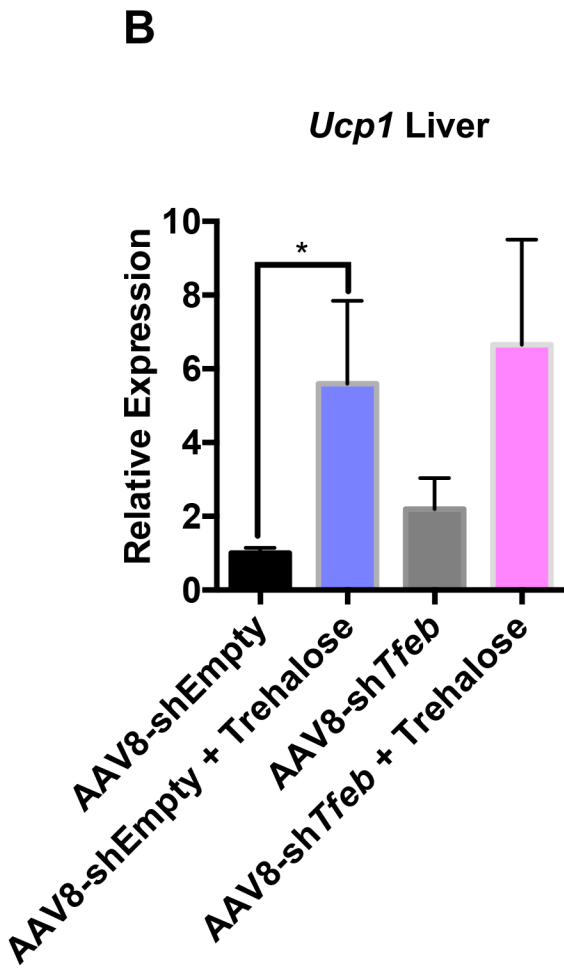

Supplement: Supplementary file 1 [file 3]
